# Supplementary material
Source: PubMed Central journal article supplement (PMC2970733)

### Aggregate Distribution of Heights

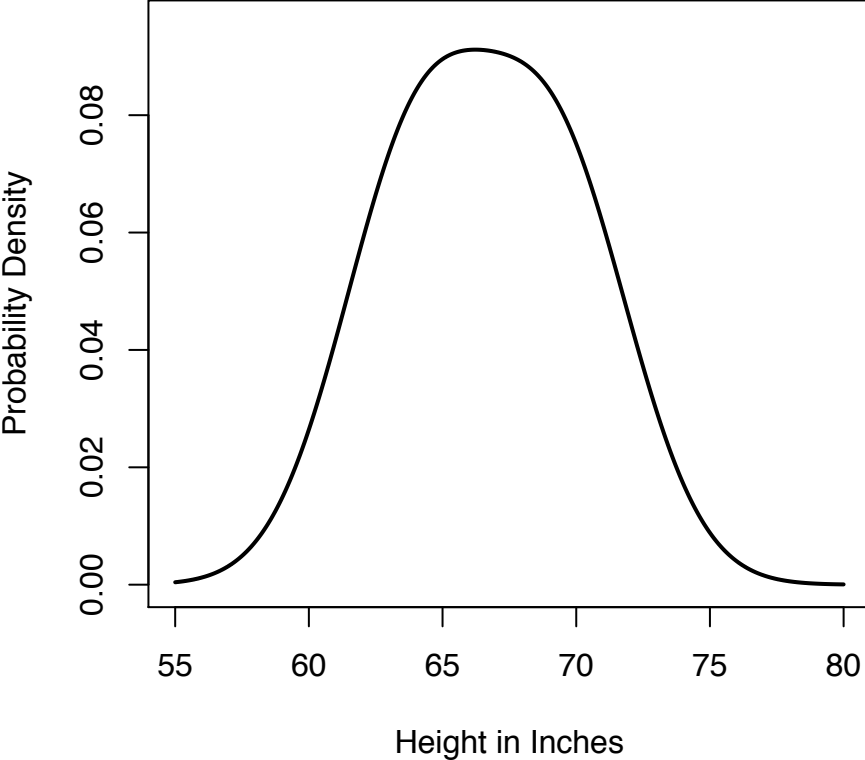

### Distribution of Heights Decomposed by Sex

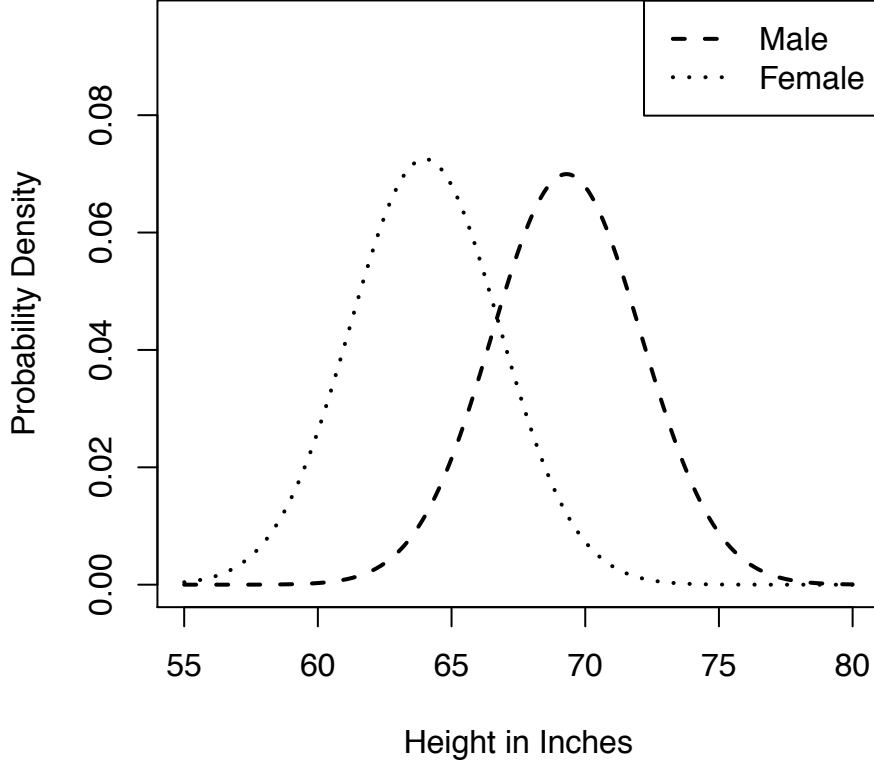

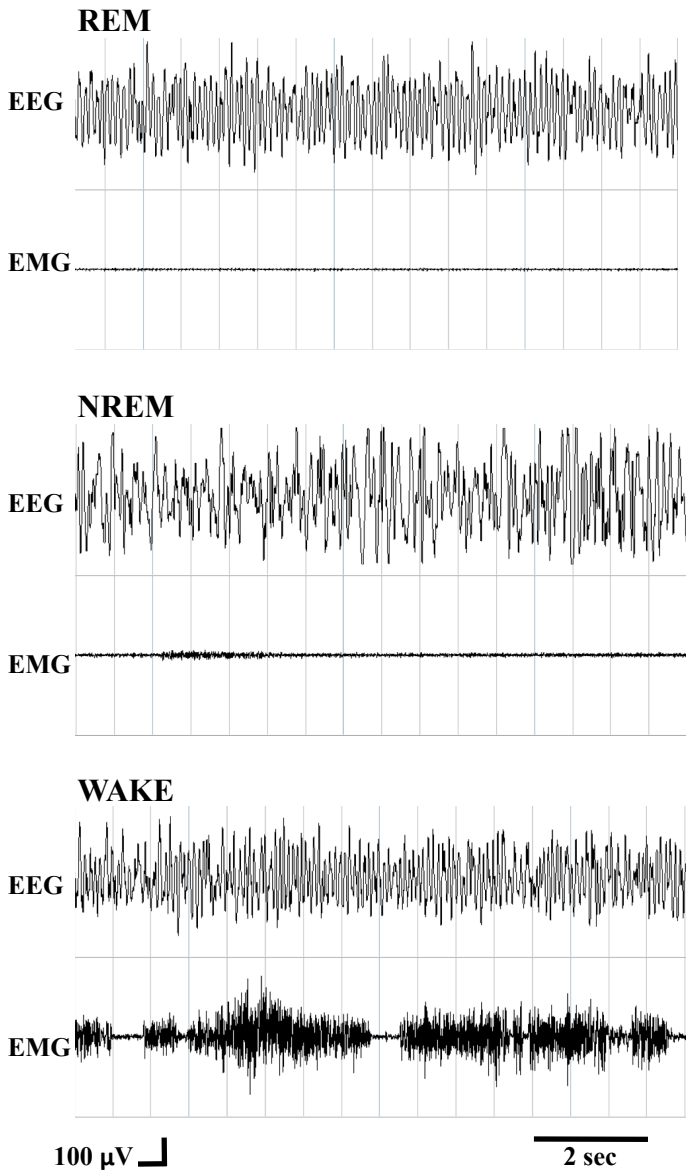

(a) Gamma QQ Plot: C57, M2, NREM→REM

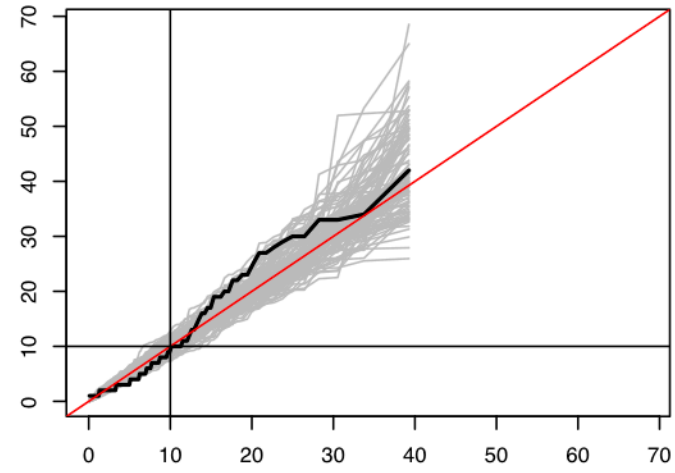

(b) Zoomed Gamma QQ Plot: C57, M2, NREM→REM

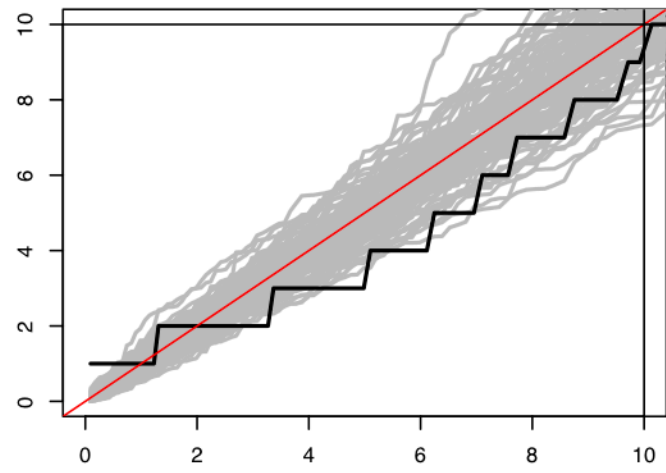

(c)

(d)

(e) Gamma QQ Plot: C57, M2, REM→NREM

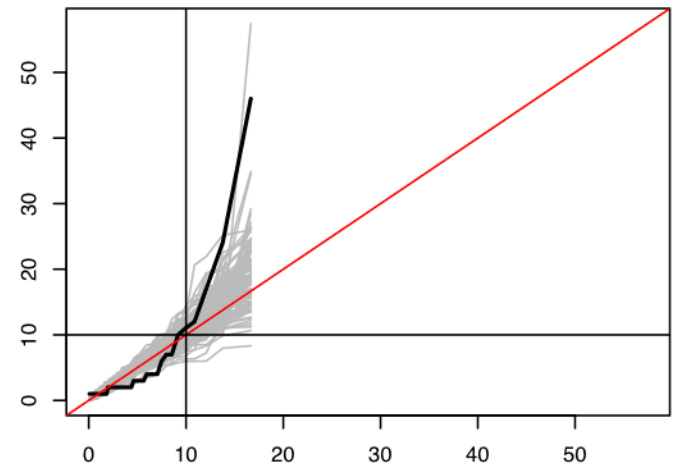

(f) Zoomed Gamma QQ Plot: C57, M2, REM→NREM

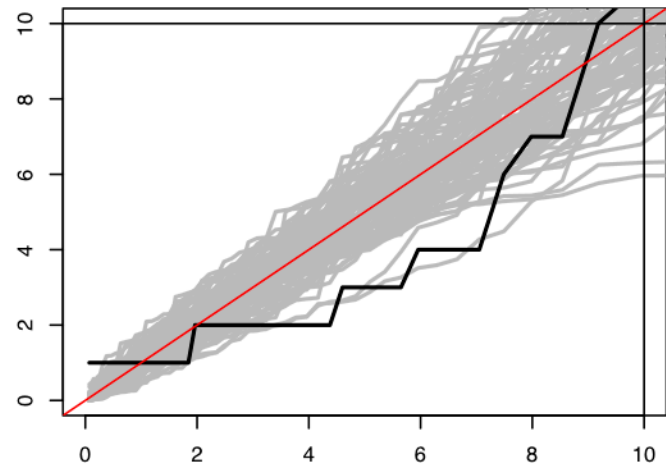

(g) Gamma QQ Plot: C57, M2, WAKE→NREM

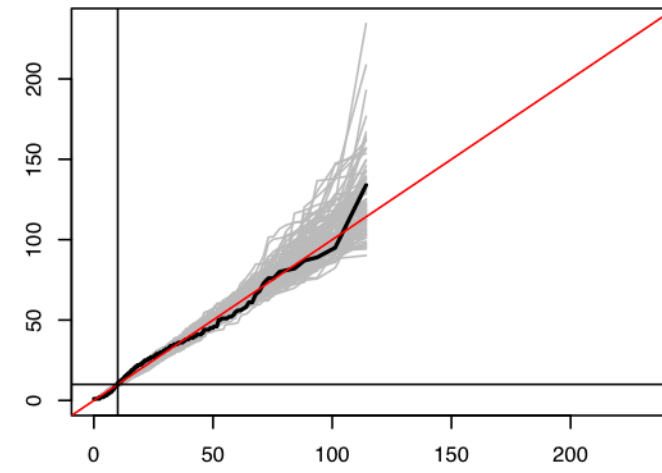

(h) Zoomed Gamma QQ Plot: C57, M2, WAKE→NREM

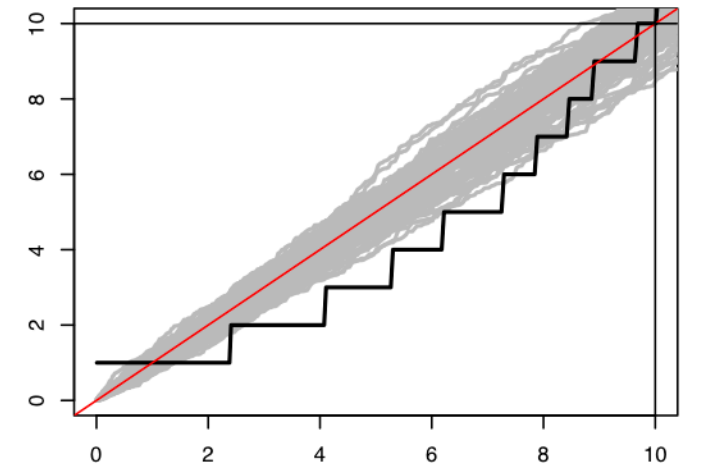

(i) Gamma QQ Plot: C57, M2, REM→WAKE

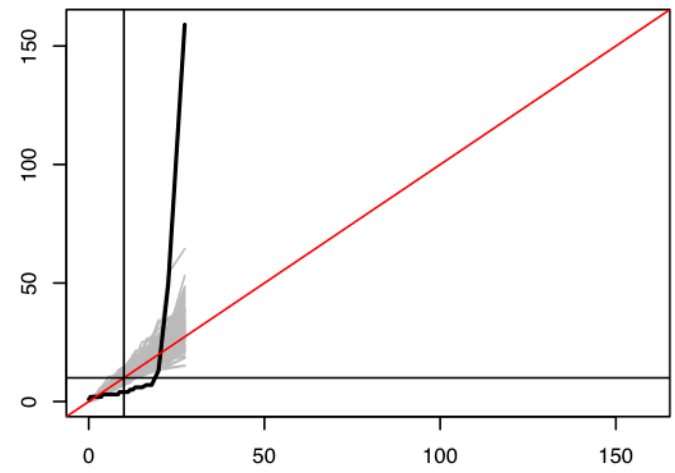

(j) Zoomed Gamma QQ Plot: C57, M2, REM→WAKE

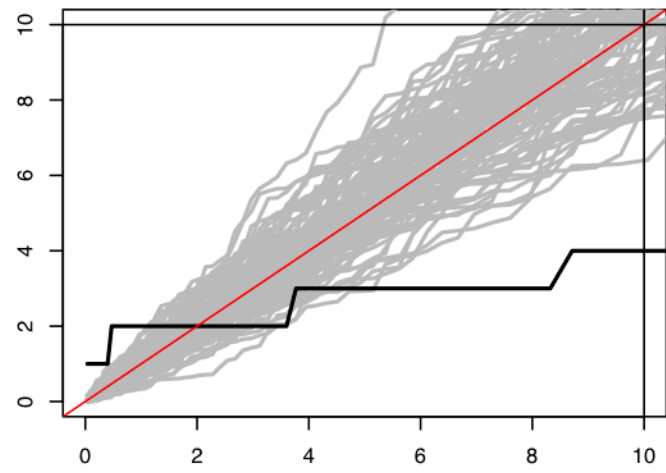

(k) Gamma QQ Plot: C57, M2, NREM→WAKE

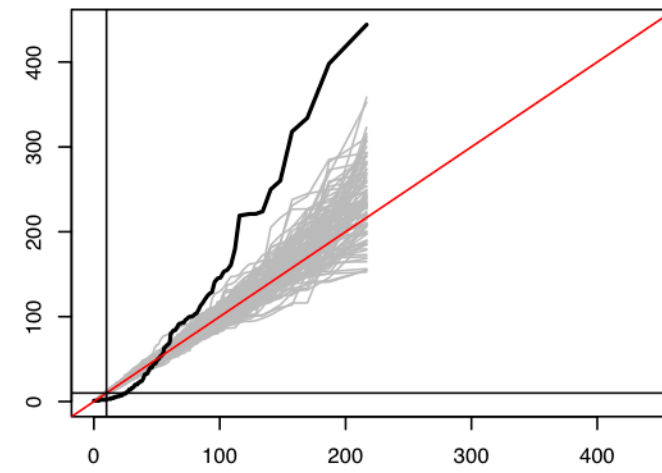

(l) Zoomed Gamma QQ Plot: C57, M2, NREM→WAKE

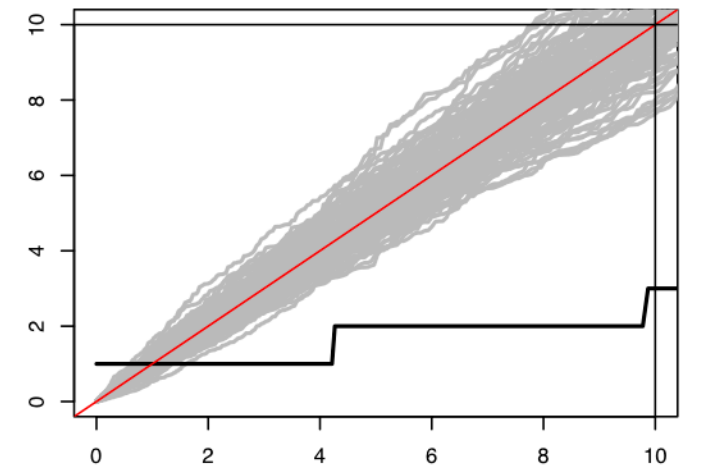

(a) Spike+Gamma QQ Plot: C57, M2, NREM→REM

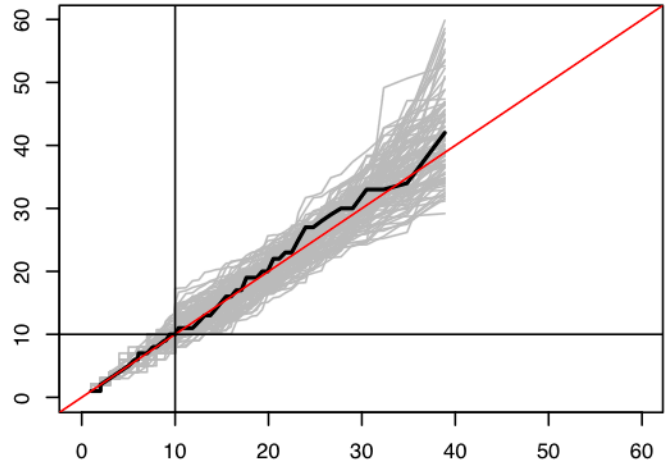

(b) Zoomed Spike+Gamma QQ Plot: C57, M2, NREM→REM

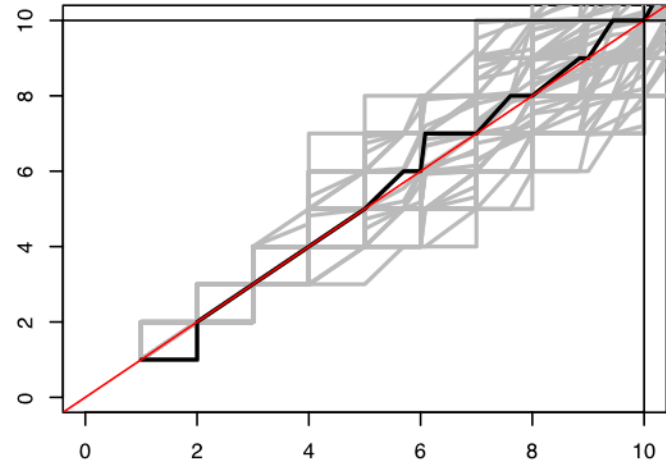

(c)

(d)

(e) Spike+Gamma QQ Plot: C57, M2, REM→NREM

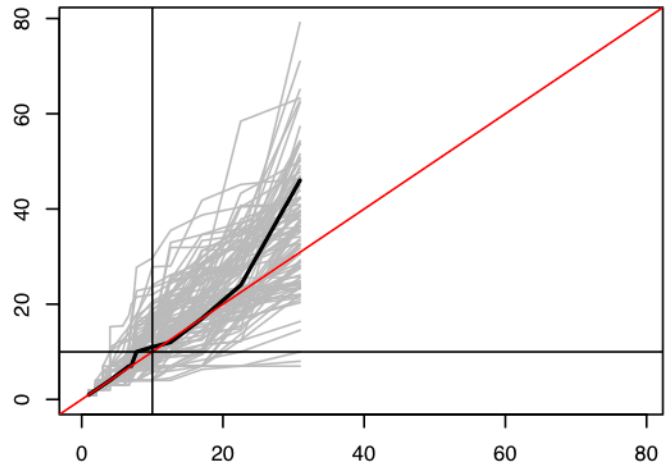

(f) Zoomed Spike+Gamma QQ Plot: C57, M2, REM→NREM

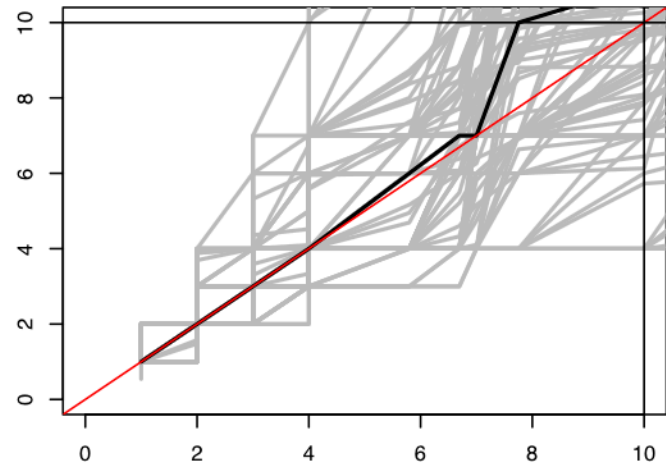

(g) Spike+Gamma QQ Plot: C57, M2, WAKE→NREM

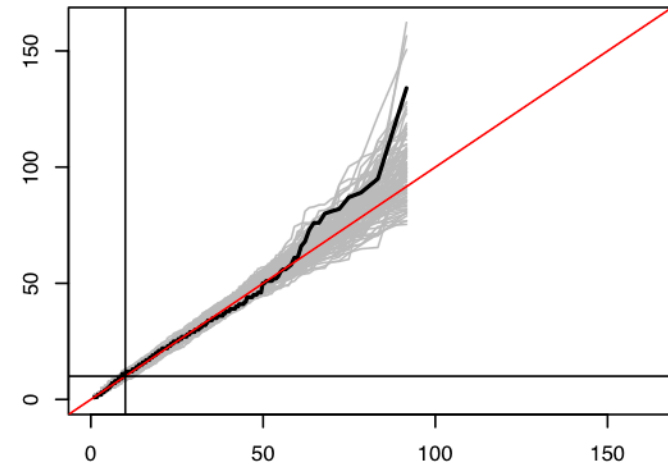

(h) Zoomed Spike+Gamma QQ Plot: C57, M2, WAKE→NREM

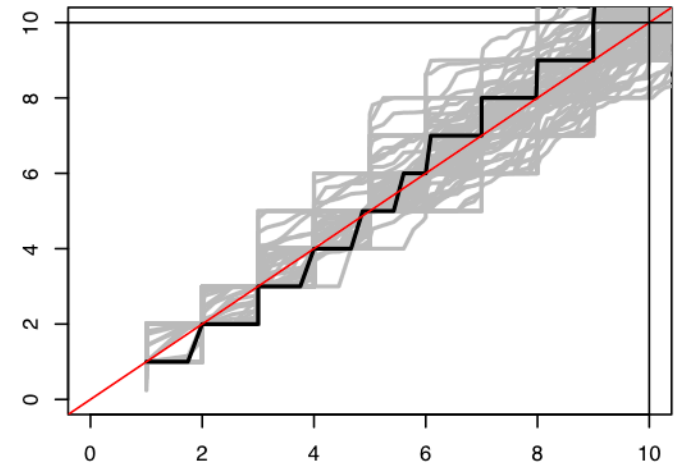

(i) Spike+Gamma QQ Plot: C57, M2, REM→WAKE

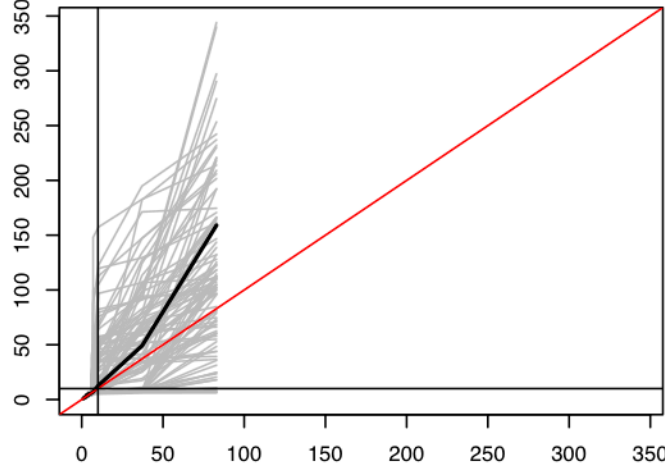

(j) Zoomed Spike+Gamma QQ Plot: C57, M2, REM→WAKE

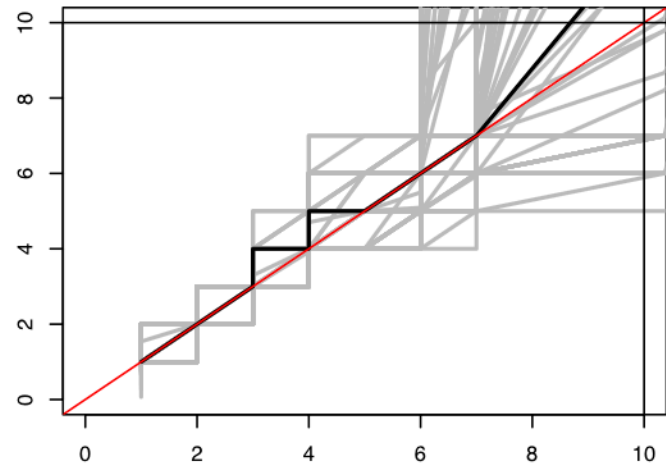

(k) Spike+Gamma QQ Plot: C57, M2, NREM→WAKE

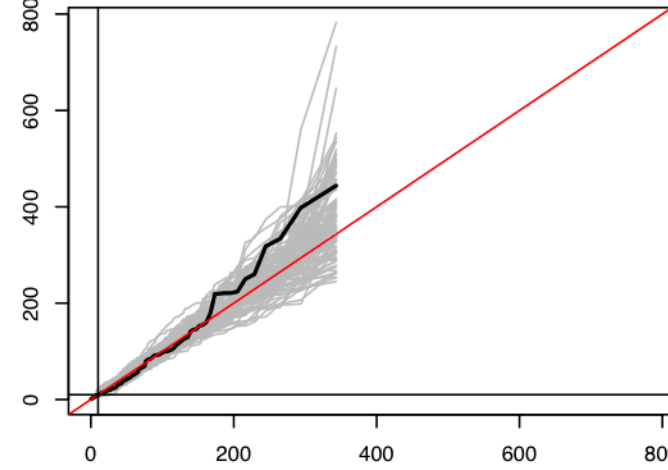

(l) Zoomed Spike+Gamma QQ Plot: C57, M2, NREM→WAKE

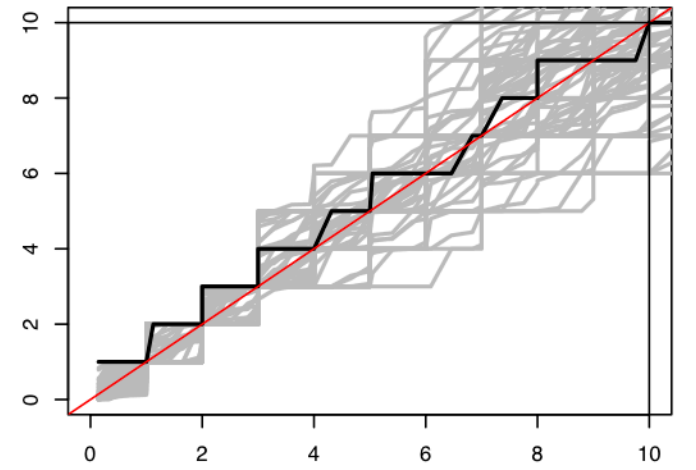

**(a) NREM→REM Bout Duration**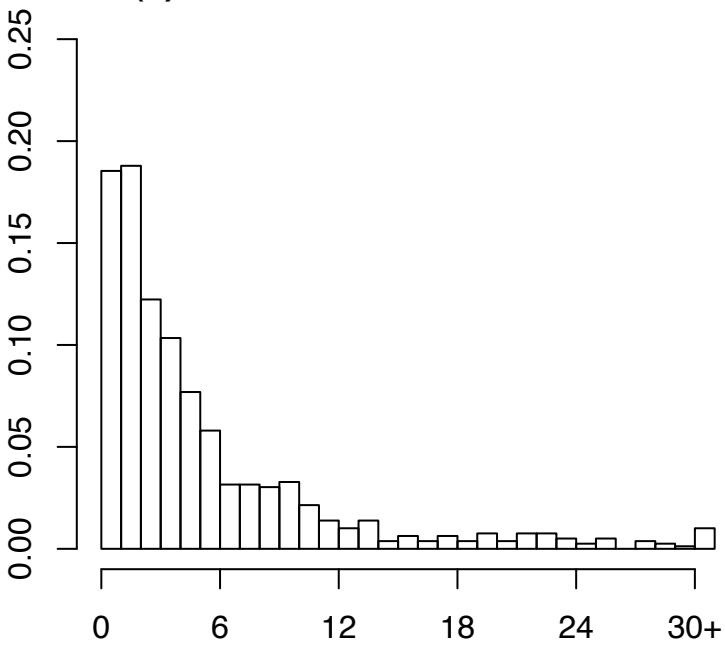**(b)****(d) WAKE→NREM Bout Duration**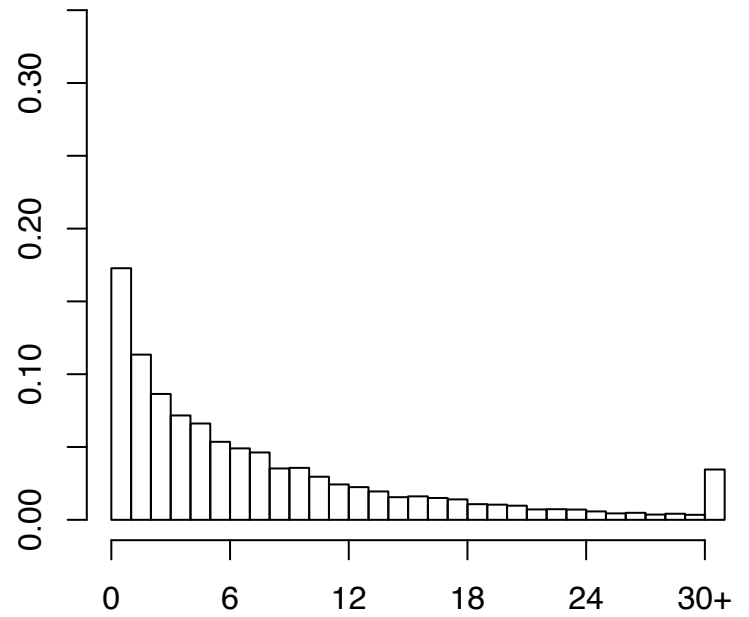**(c) REM→NREM Bout Duration**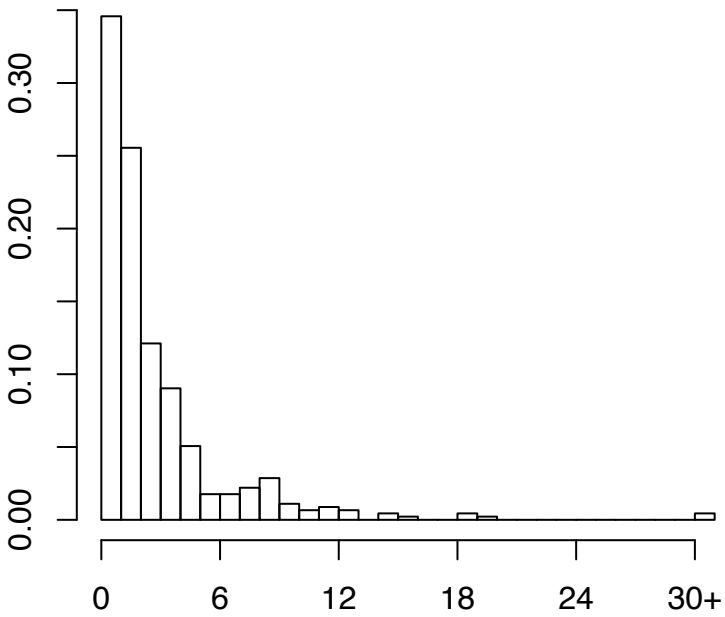**(e) REM→WAKE Bout Duration**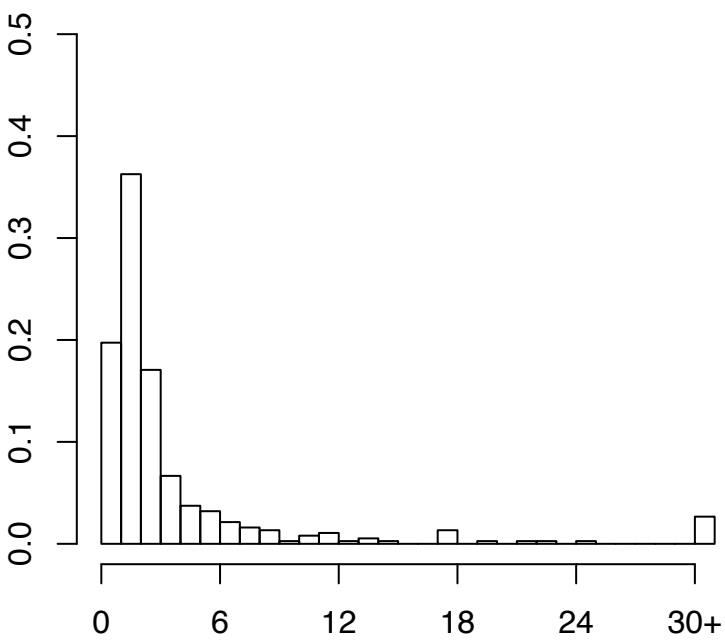**(f) NREM→WAKE Bout Duration**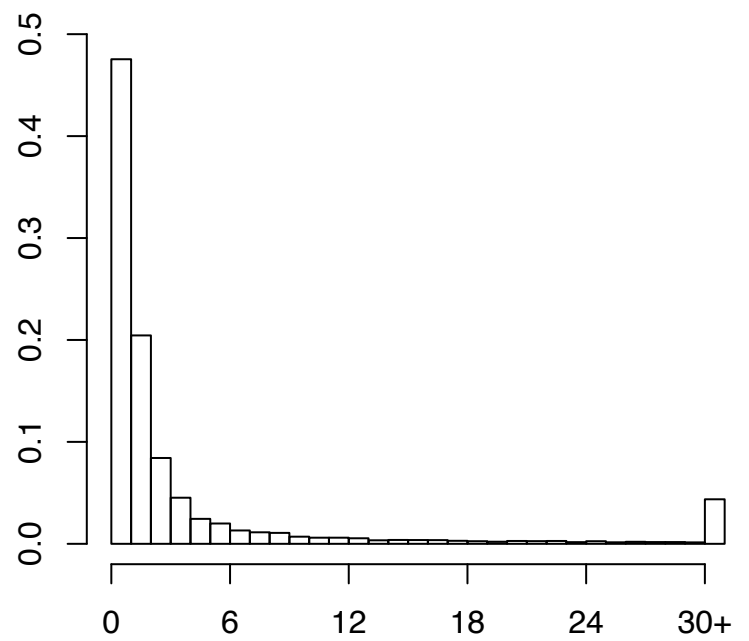

(b)

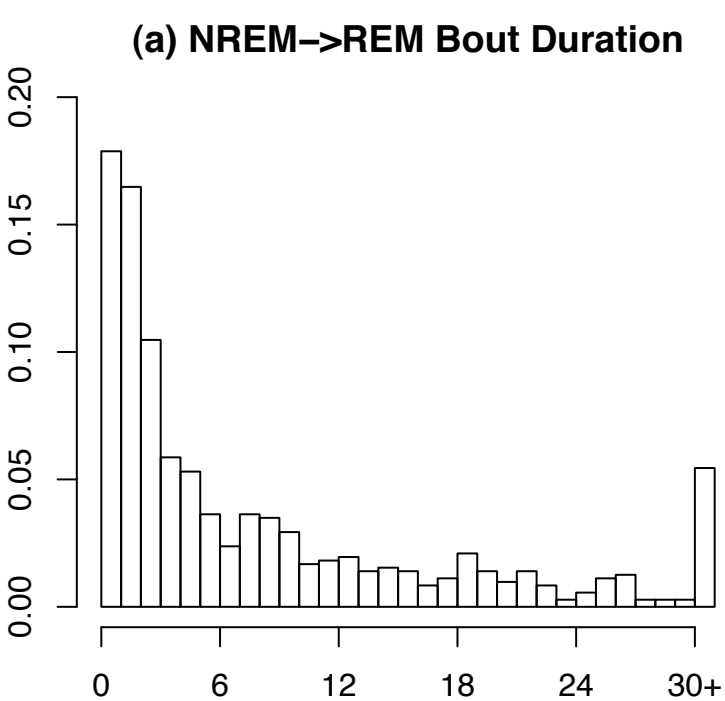

(c) REM→NREM Bout Duration

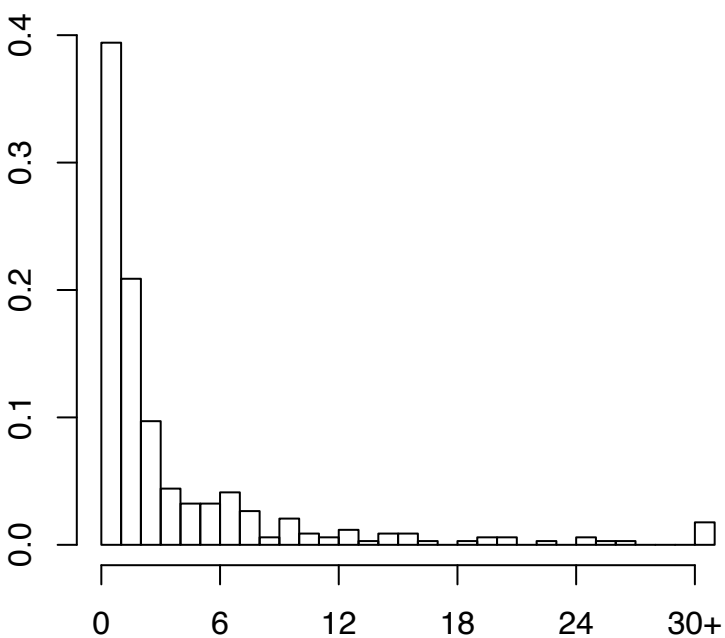

(e) REM→WAKE Bout Duration

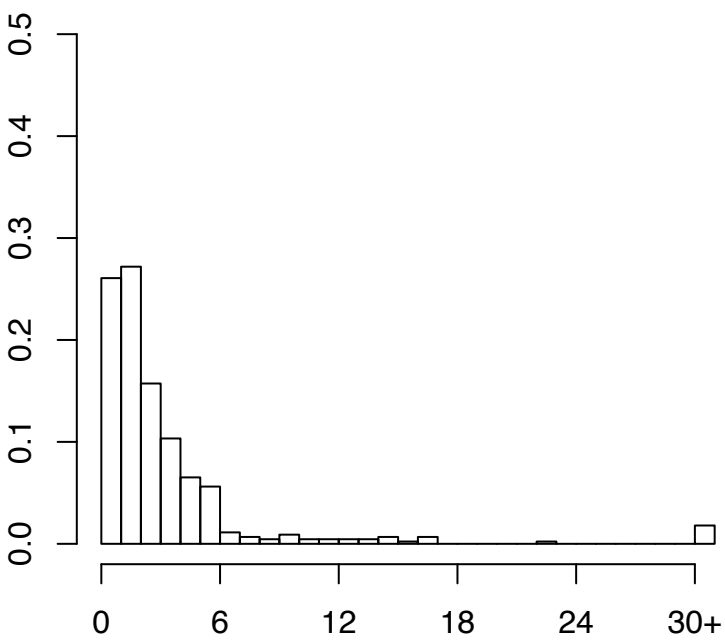

(d) WAKE→NREM Bout Duration

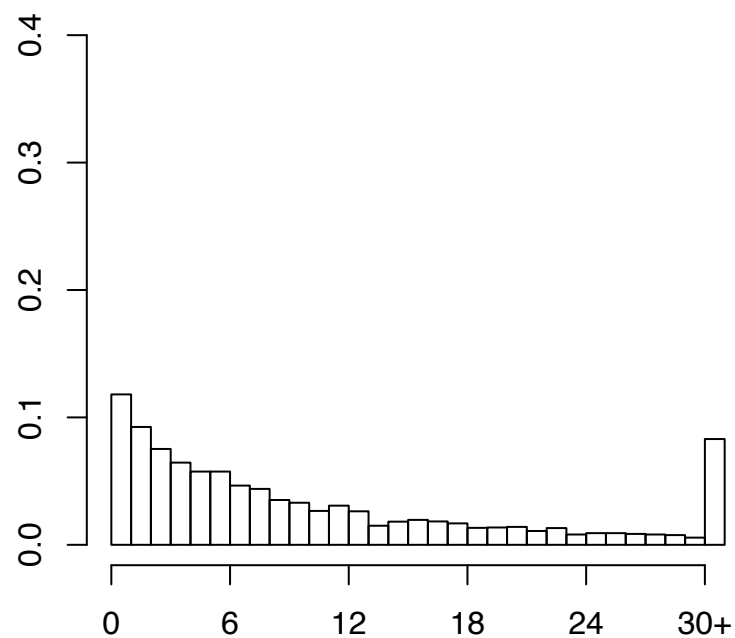

(f) NREM→WAKE Bout Duration

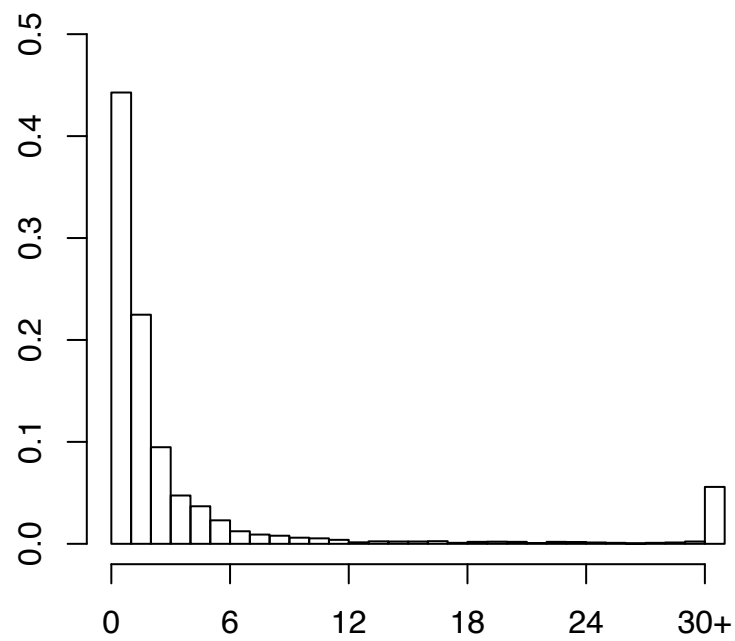

**(a) NREM→REM Bout Duration**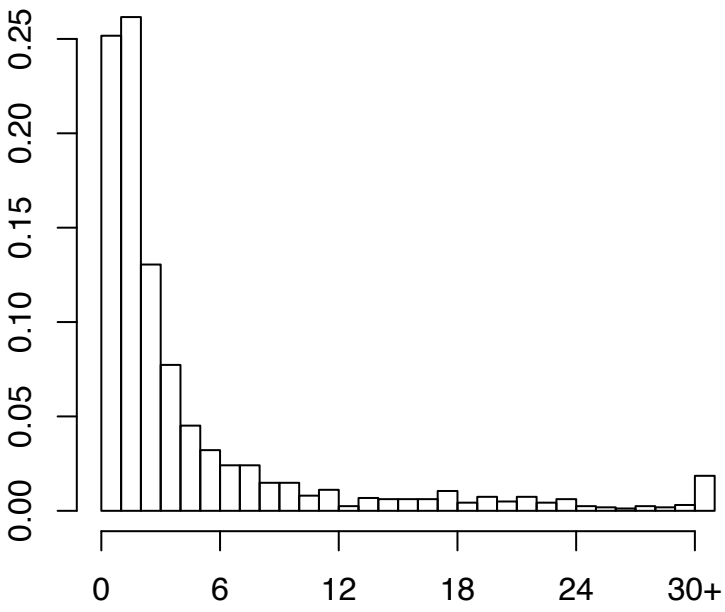**(b)****(c) REM→NREM Bout Duration**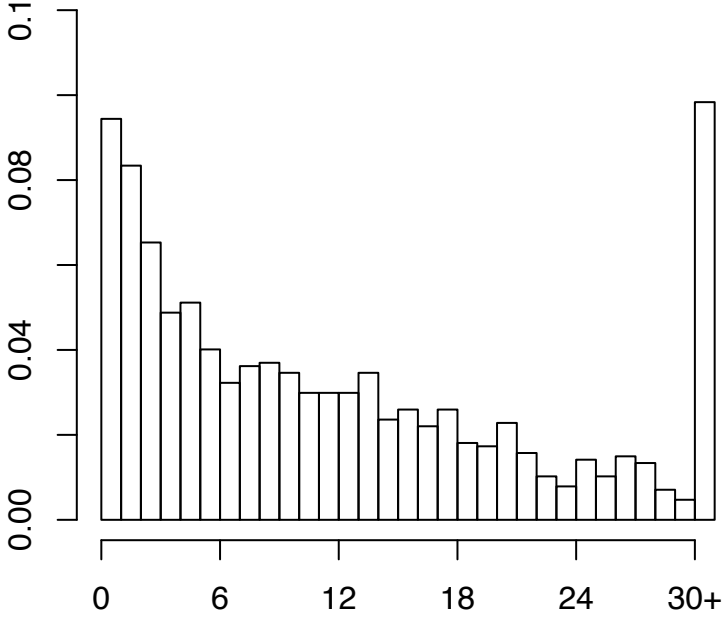**(d) WAKE→NREM Bout Duration**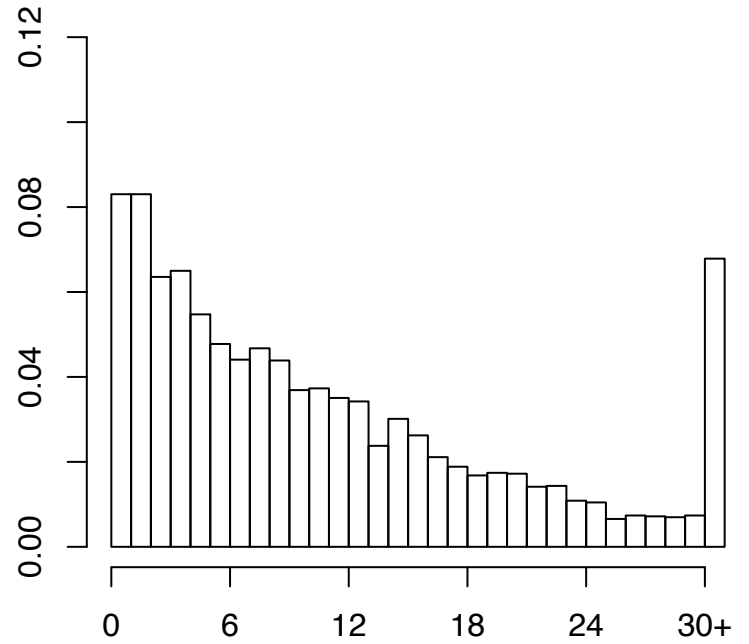**(e) REM→WAKE Bout Duration**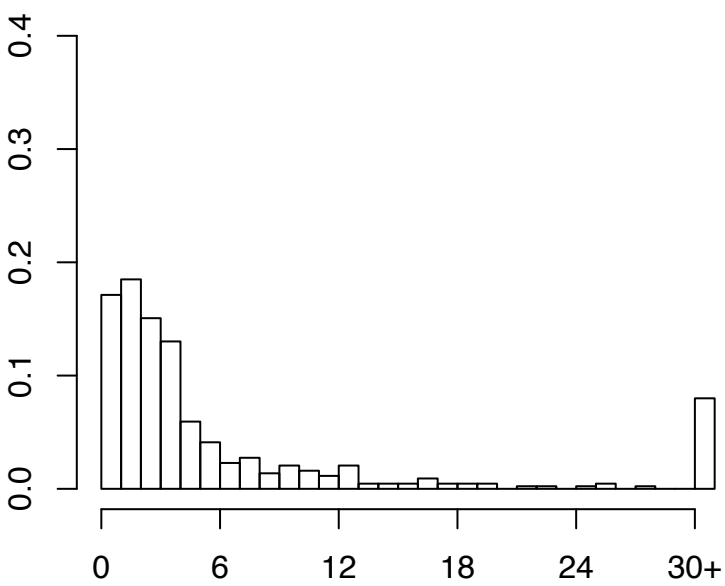**(f) NREM→WAKE Bout Duration**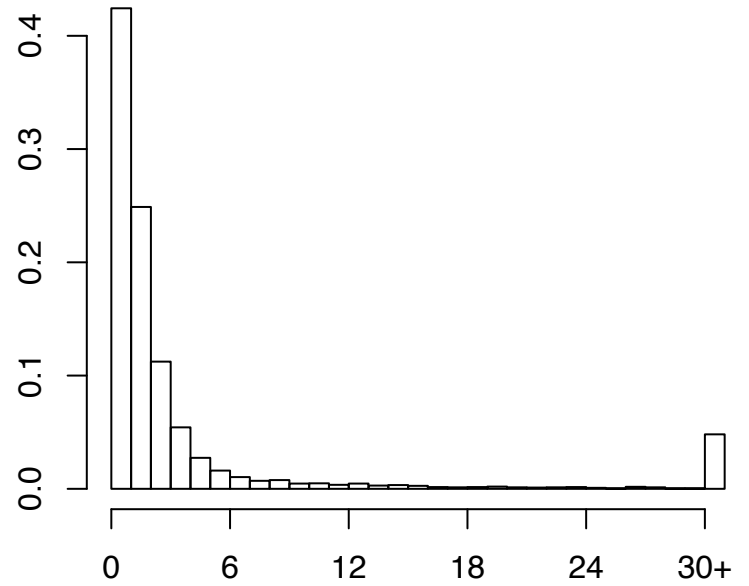

## Fraction of Time

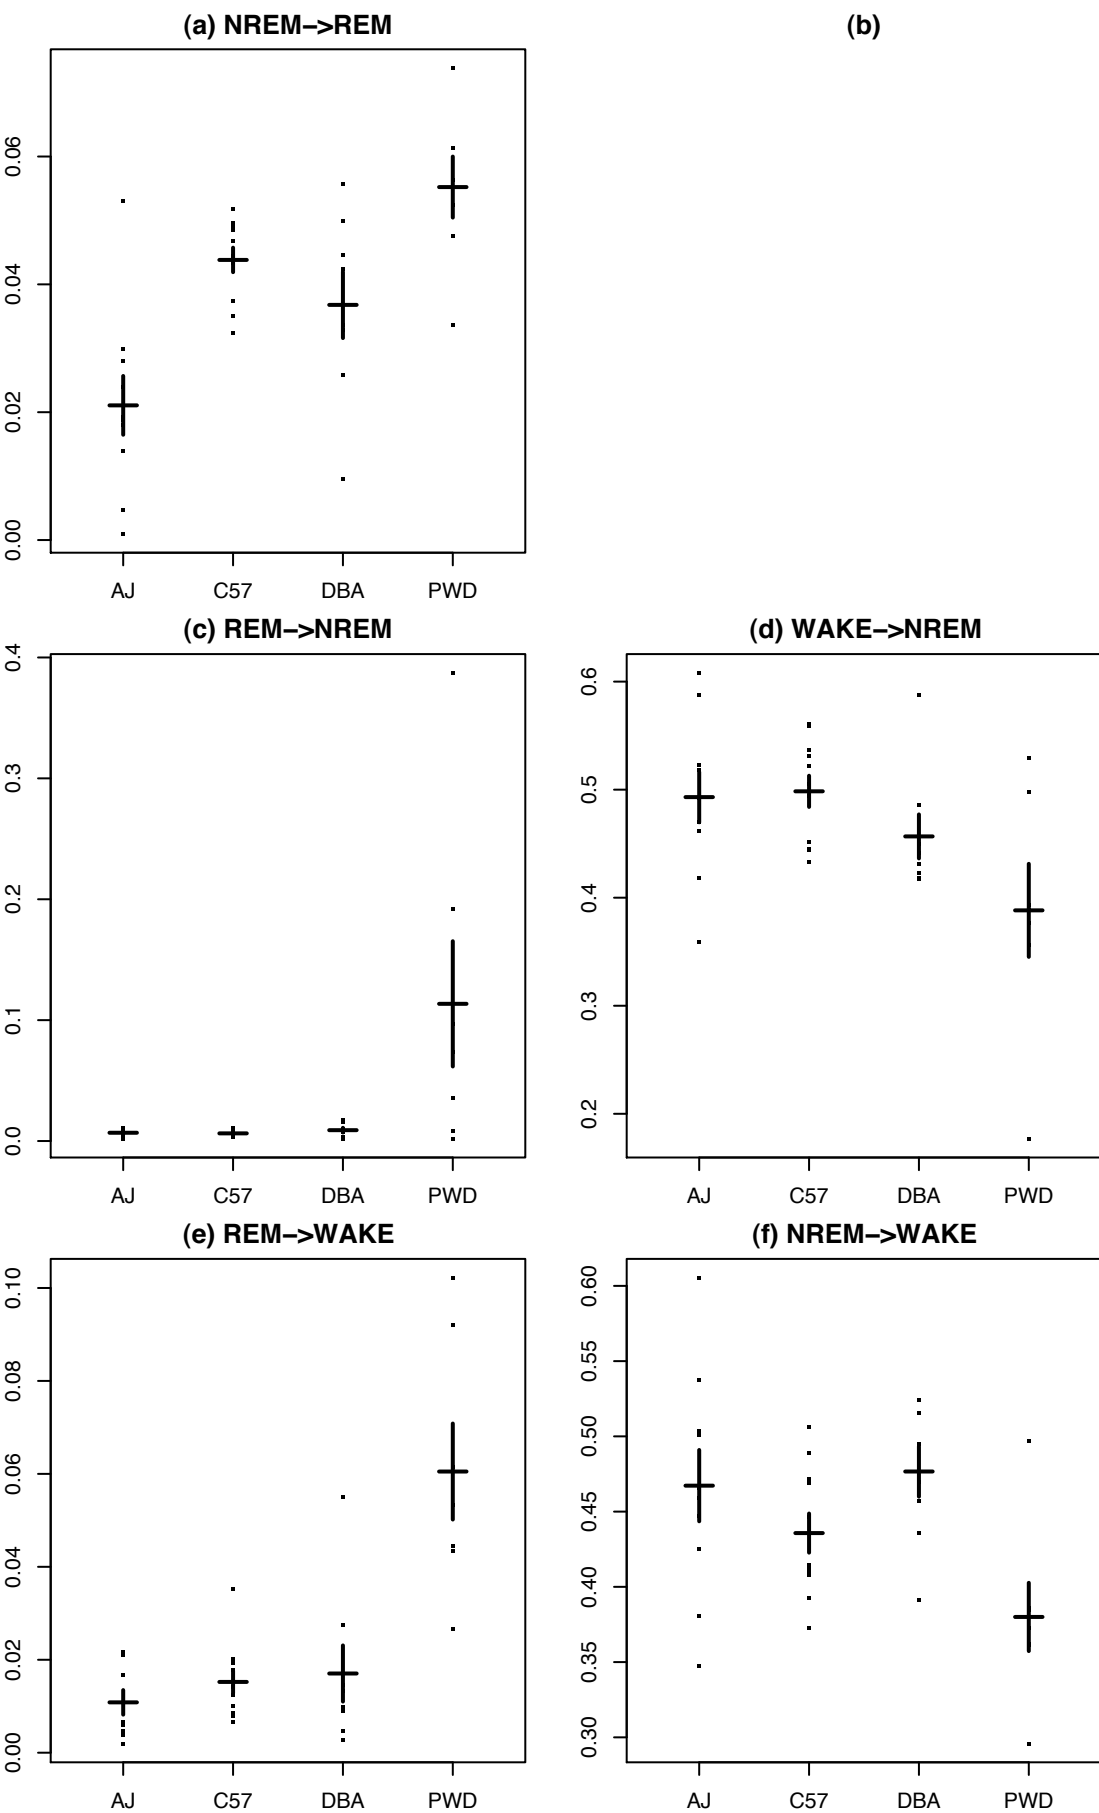



## Average Duration

(a) NREM→REM

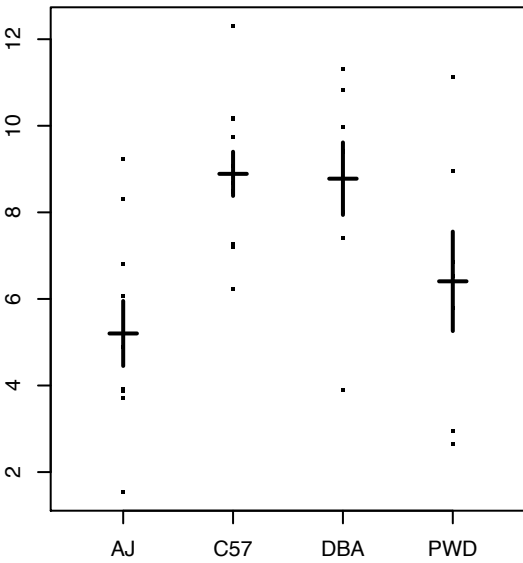

(b)

(c) REM→NREM

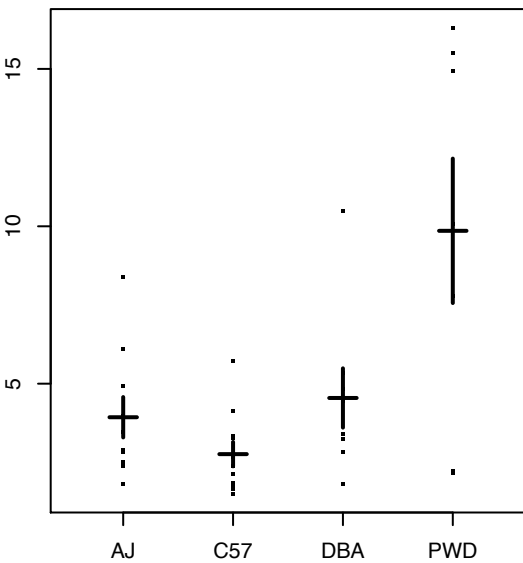

(d) WAKE→NREM

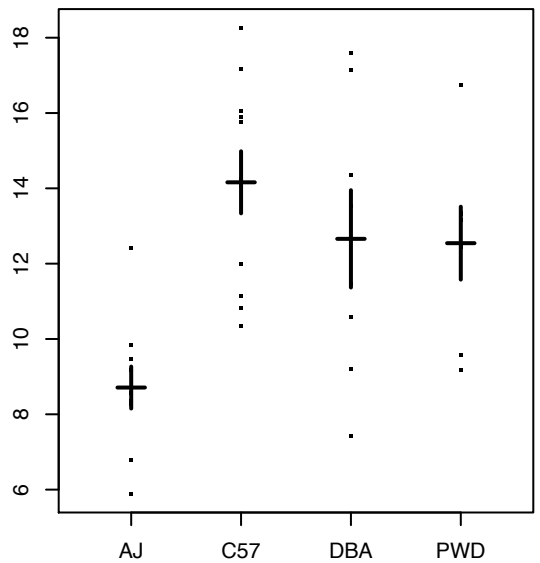

(e) REM→WAKE

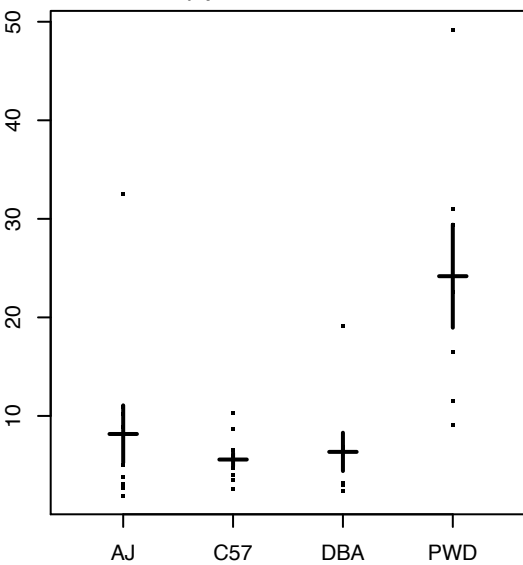

(f) NREM→WAKE

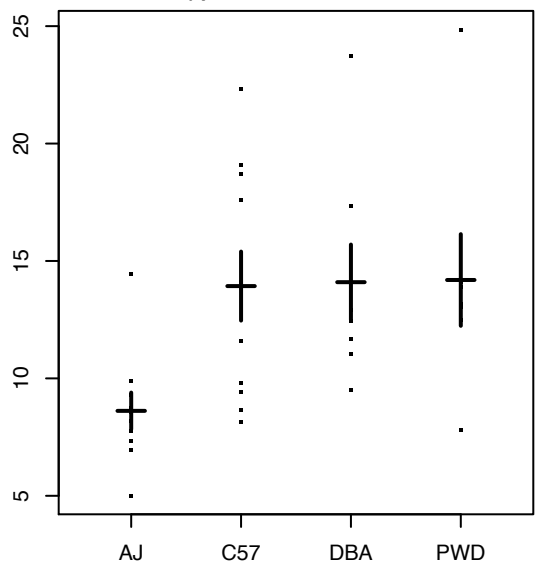

REM

NREM

WAKE

(a)

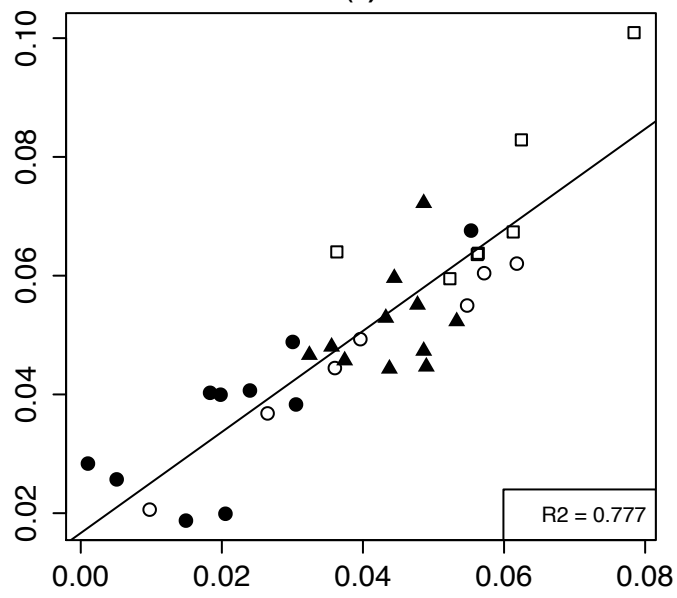

(b)

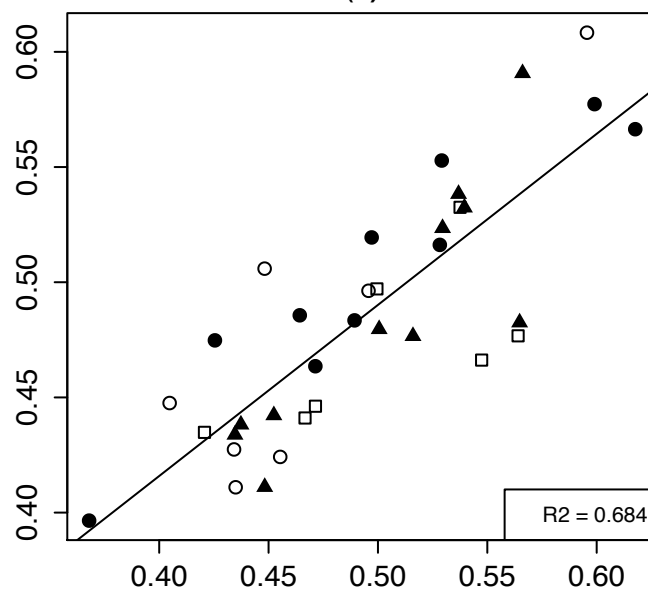

(c)

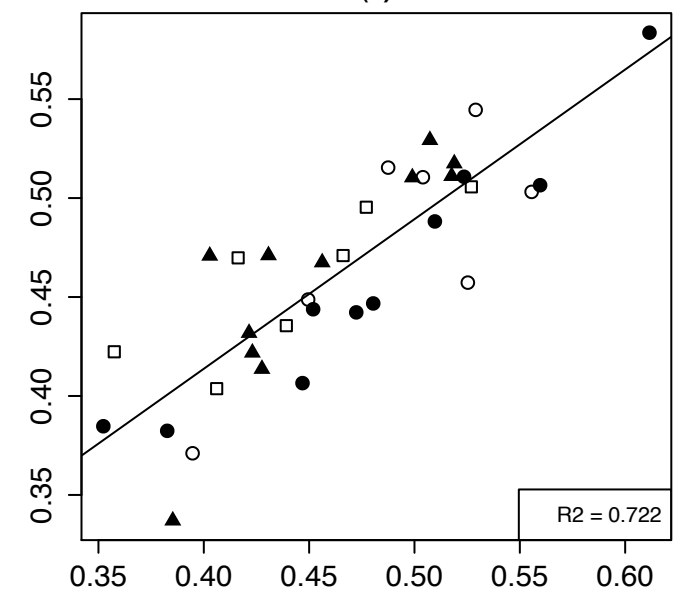

(d)

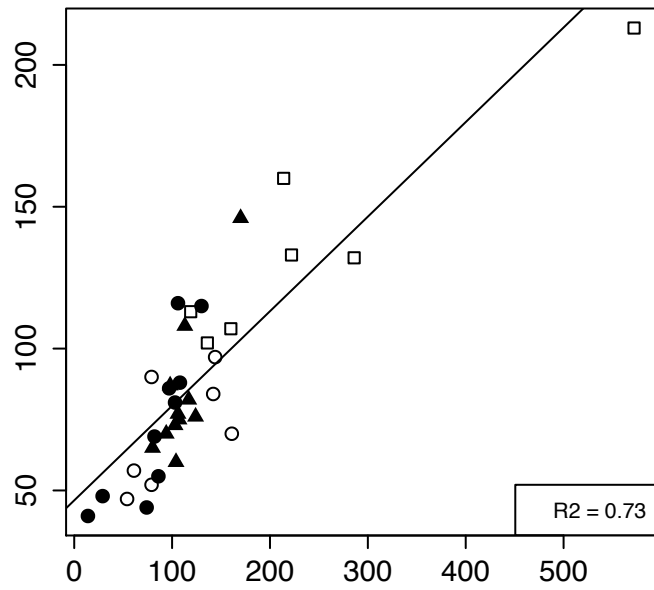

(e)

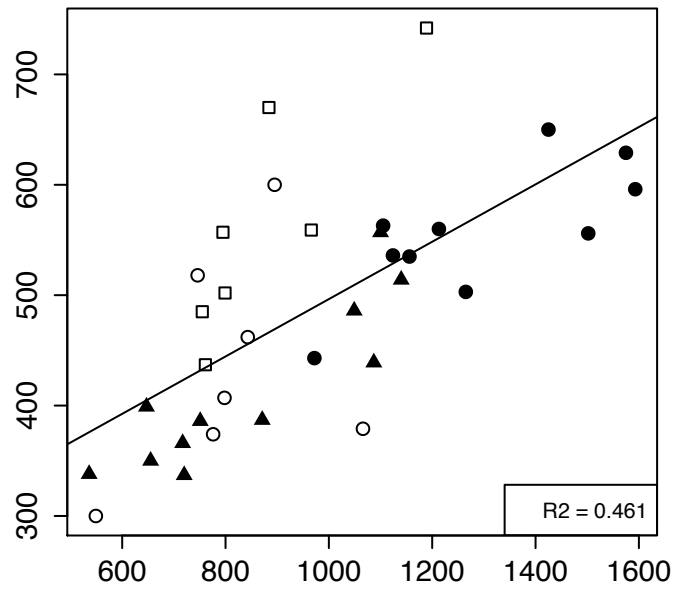

(f)

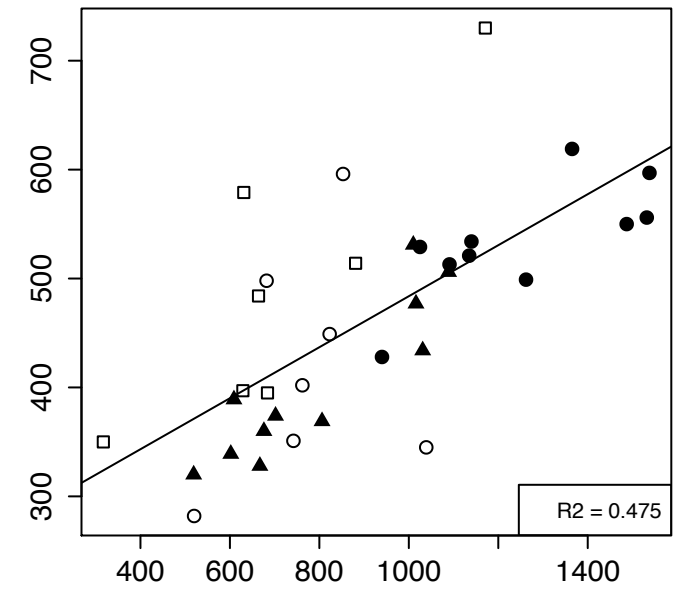

(g)

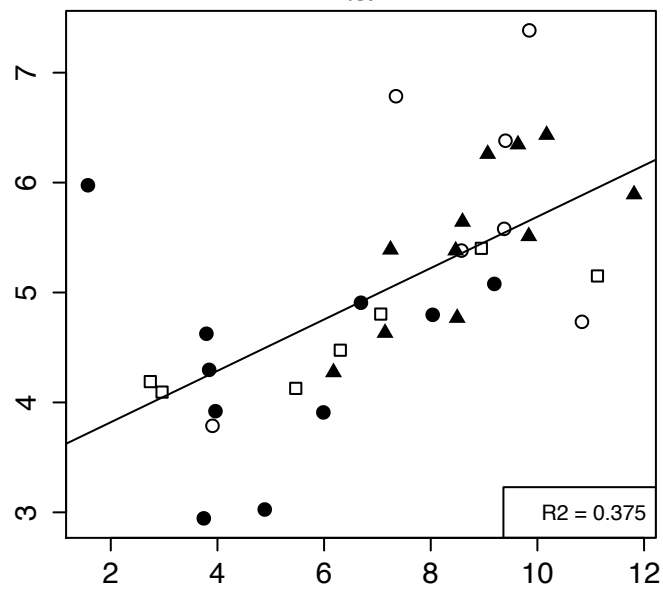

(h)

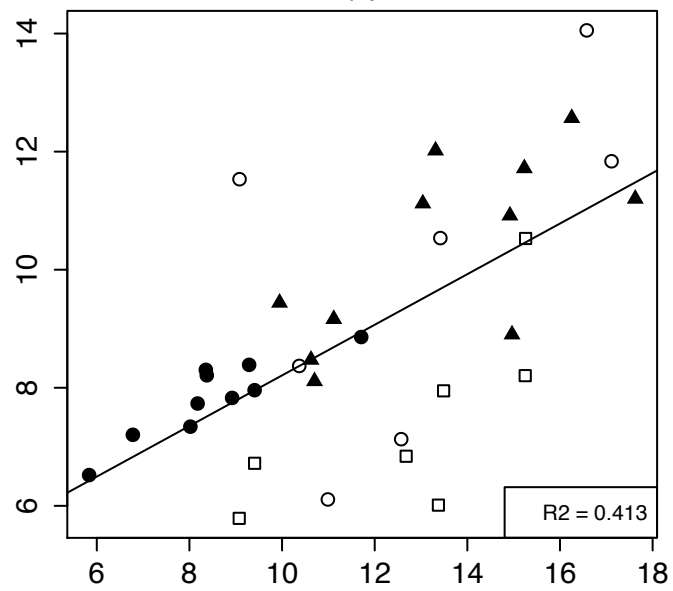

(i)

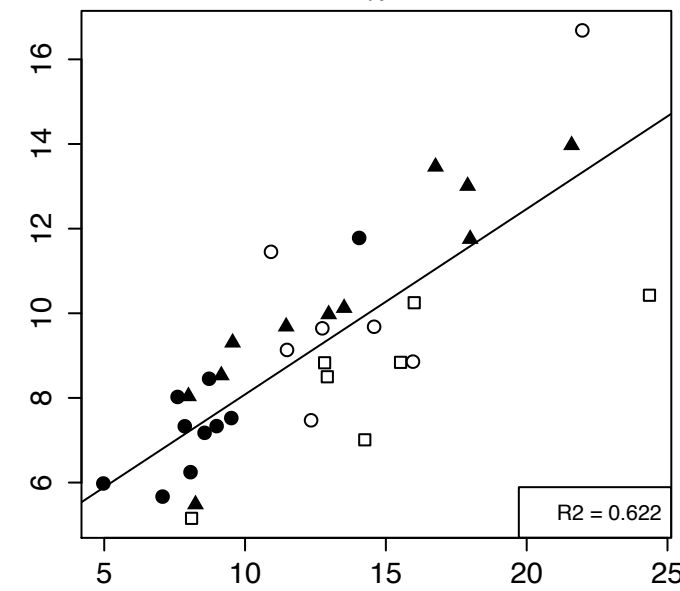

● AJ ▲ C57 ○ DBA □ PWD

Fraction of Time

Number of Bouts

Average Duration

## Number of Bouts

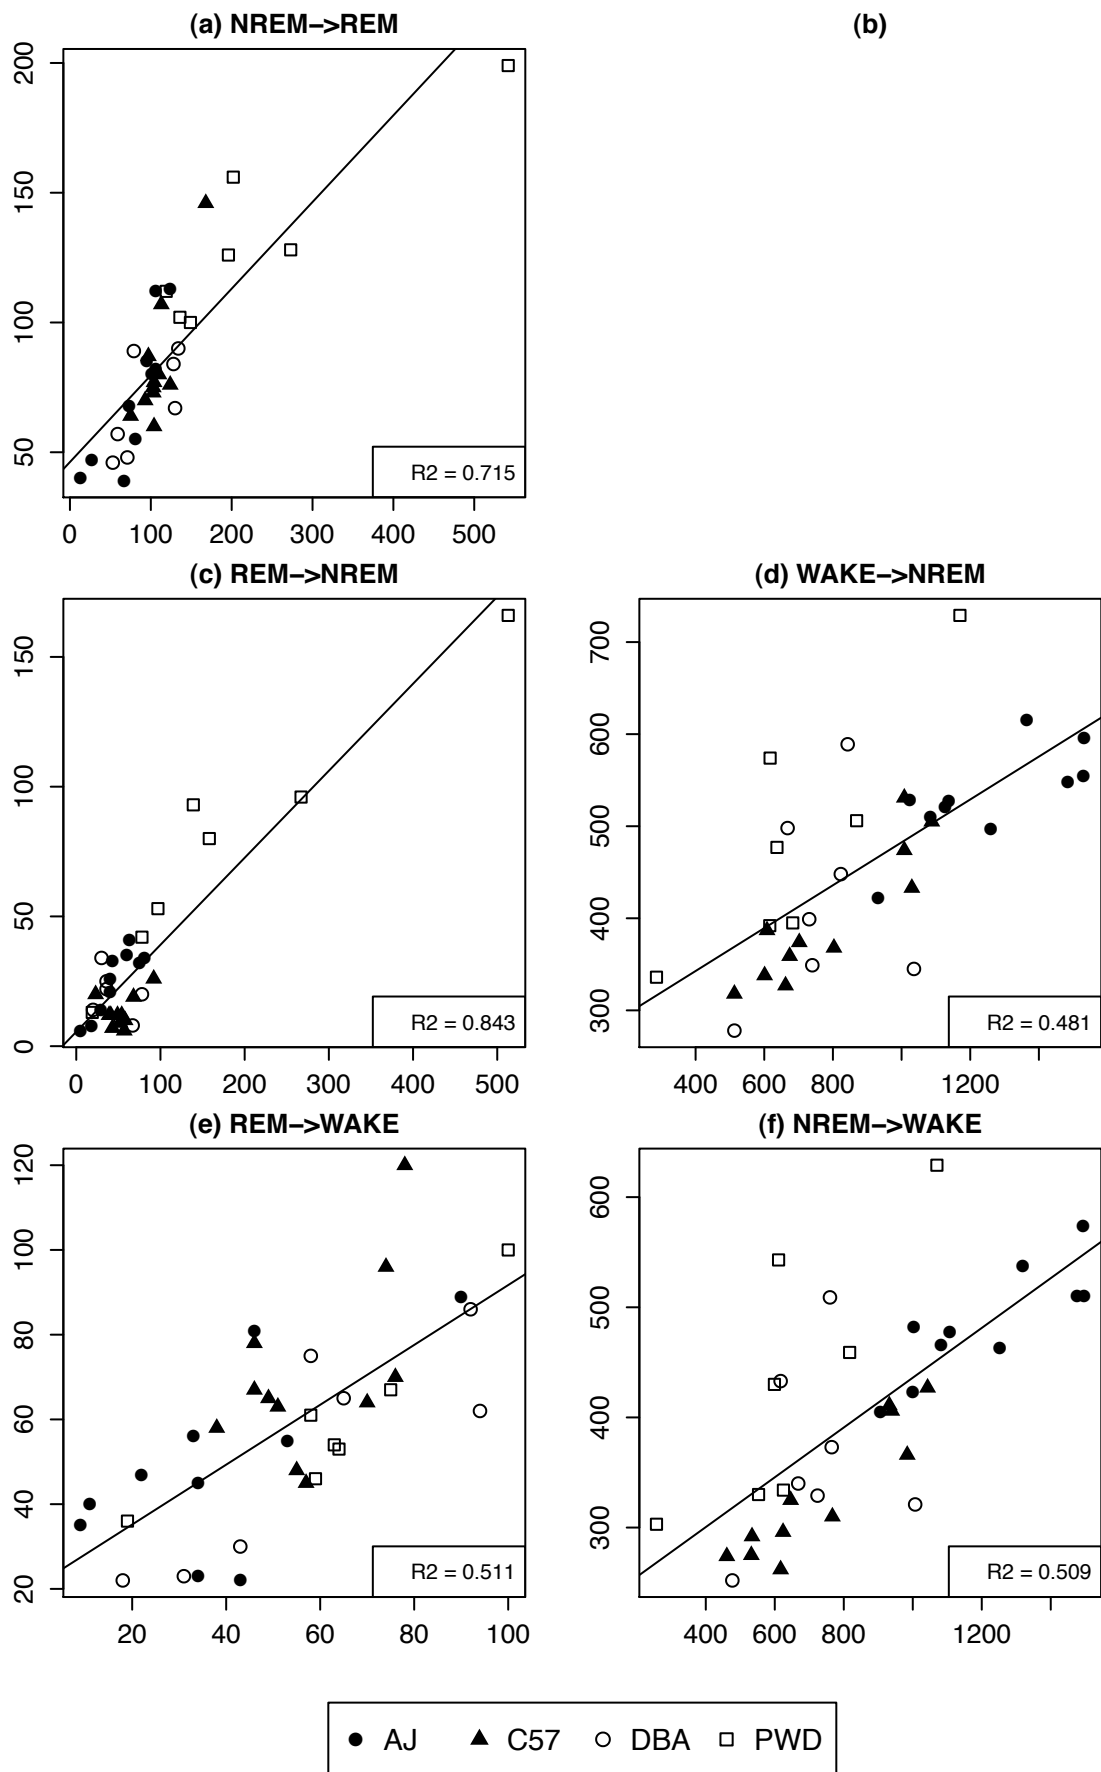

## Spike Size

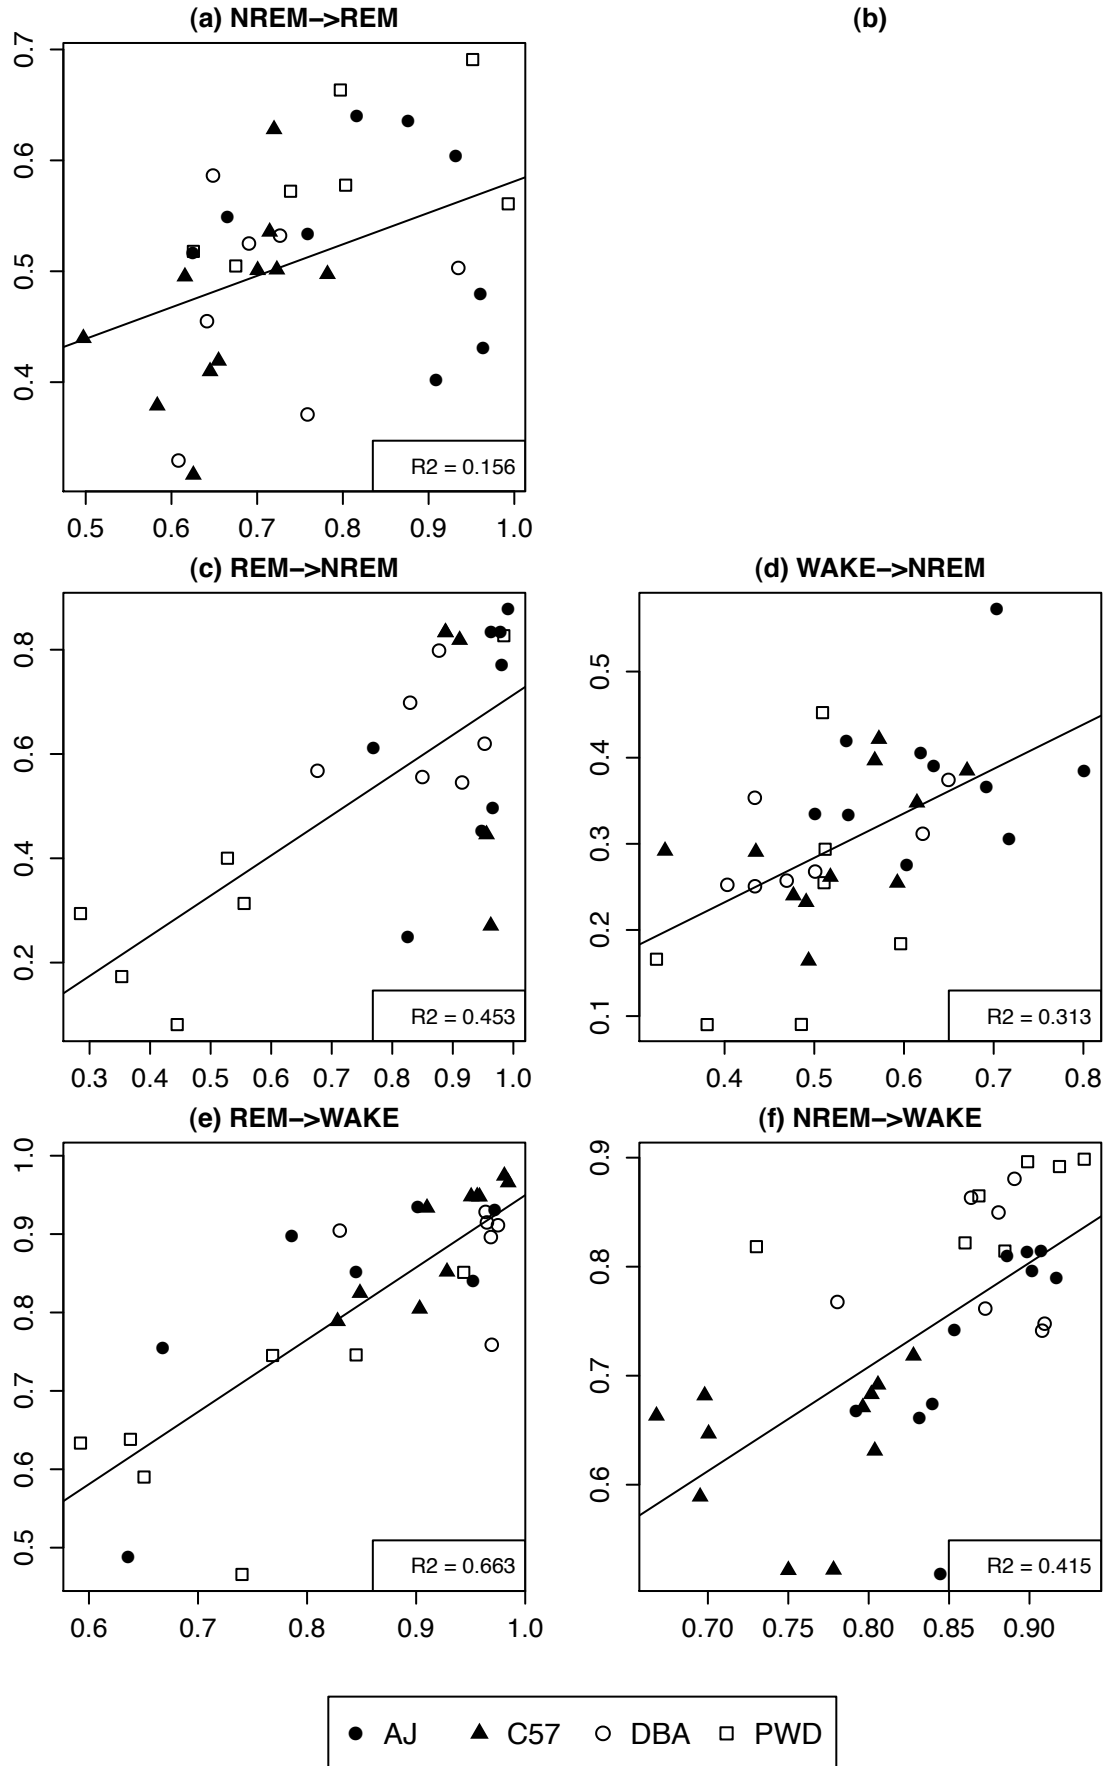

## Average Slab Size

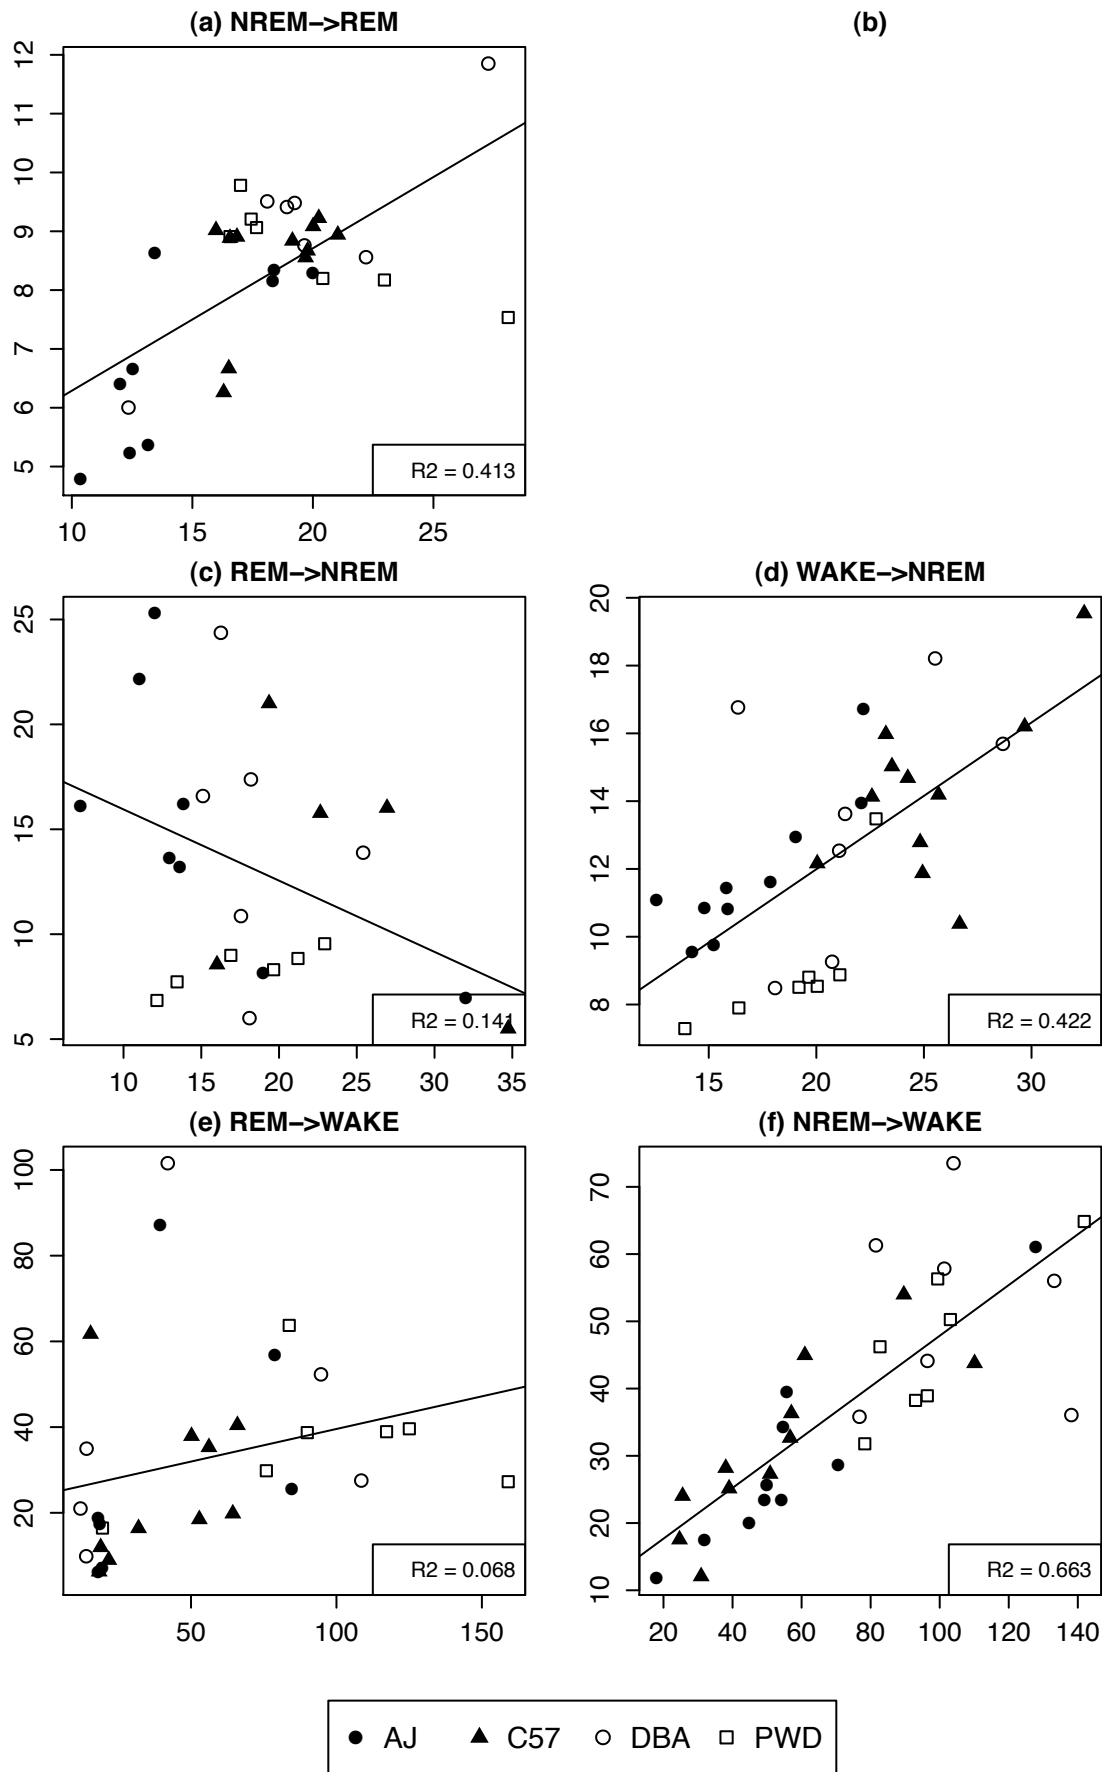

Supplement: NIHMS234037-supplement-02.pdf [file NIHMS234037-supplement-02.pdf]
